# Supplementary material
Source: Springer Nature journal article supplement (https://www.springermedizin.de/resource/supplementary/12943_2014_1298_MOESM1_ESM.pdf/9553226)

Fig. S1

A

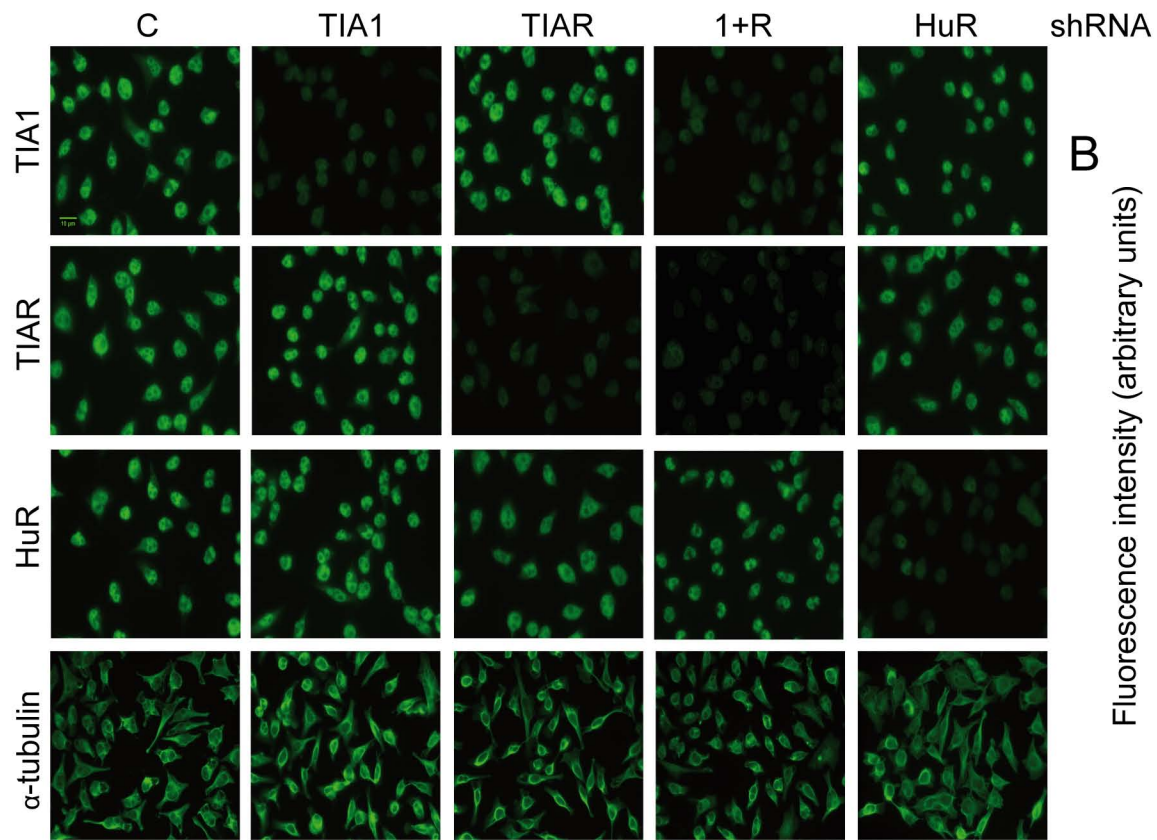

B

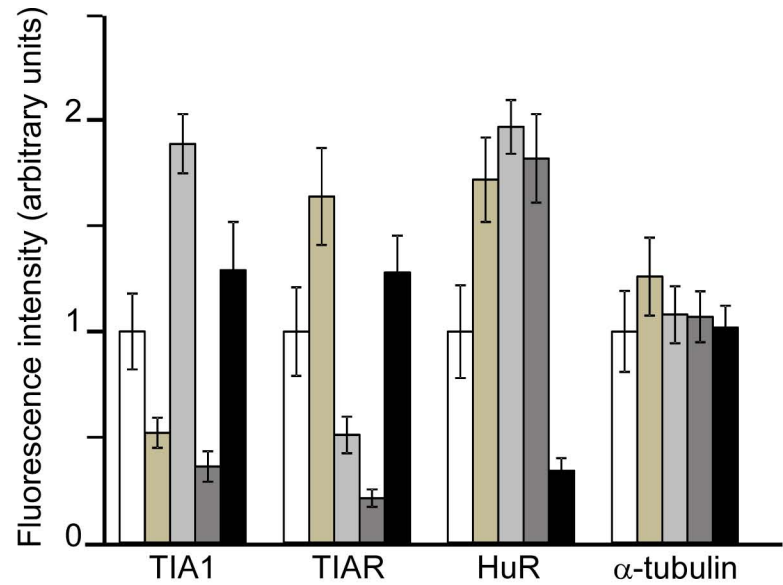

Supplement: MOESM1 [file 9553226]
